# Supplementary material
Source: Springer Nature journal article supplement (https://www.springermedizin.de/resource/supplementary/13045_2013_385_MOESM2_ESM.pdf/9661272)
Supplement: MOESM2 [file 9661272]

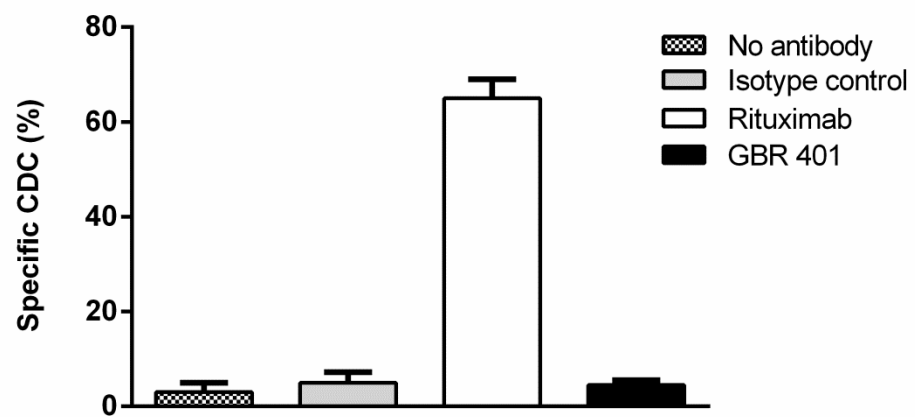

Figure S2
